# Supplementary material for: Prevalent Variants in the LDLR Gene Impair Responsiveness to Rosuvastatin among Family Members of Patients with Premature Myocardial Infarction
Source: MDPI journal article supplement (doi:10.3390/jpm13121725), 2023-12-18
Supplement: s1 [file s1]

**Supplementary tables.**

**Table S1. Characteristics of patients with premature MI**

| <b>Patient</b>             | <b>No1</b>  | <b>No2</b>  | <b>No3</b>  | <b>No4</b>  |
|----------------------------|-------------|-------------|-------------|-------------|
| Pedegree                   | 1           | 2           | 3           | 4           |
| Age                        | 45          | 55          | 57          | 47          |
| Sex                        | 1           | 2           | 2           | 1           |
| Ethnic group               | 1           | 1           | 1           | 1           |
| Living area                | Countryside | Countryside | Countryside | Countryside |
| Job                        | Farmer      | Farmer      | Farmer      | Farmer      |
| Height (metre)             | 169         | 158         | 156         | 176         |
| Weight (kilogram)          | 66          | 60          | 60          | 80          |
| Waist (cm)                 | 86          | 77          | 88          | 89          |
| Hip (cm)                   | 91          | 92          | 90          | 100         |
| BMI (kg/m2)                | 23.11       | 24.03       | 24.65       | 25.83       |
| History of smoking         | 2           | 2           | 2           | 1           |
| Sedentary lifestyle        | 1           | 0           | 0           | 0           |
| Hypertension               | Yes         | No          | Yes         | No          |
| Blood pressure             | 140/90      | 120/80      | 140/90      | 130/80      |
| Diabetes                   | No          | No          | No          | No          |
| History of MI              | Yes         | Yes         | Yes         | Yes         |
| Glucose (mmol/L)           | 6.80        | 6.00        | 12.69       | 4.97        |
| HbA1c (%)                  | 5.60        | 5.80        | 6.10        | 5.20        |
| Ure (mmol/L)               | 6.50        | 7.12        | 5.80        | 6.20        |
| Creatinin (mcmol/L)        | 96.00       | 99.08       | 87.30       | 112.30      |
| eGFR (mL/min/1.73m2)       | 86.00       | 98.00       | 63.52       | 66.90       |
| SGOT (U/L)                 | 29.00       | 17.00       | 38.00       | 128.00      |
| SGAT (U/L)                 | 26.00       | 14.00       | 33.00       | 87.00       |
| GGT (U/L)                  | 40.00       | 17.00       | 47.00       | 110.00      |
| Total cholesterol (mmol/L) | 6.90        | 5.40        | 6.10        | 6.36        |
| Triglyceride (mmol/L)      | 1.60        | 2.80        | 1.88        | 4.97        |

|                        |          |              |              |              |
|------------------------|----------|--------------|--------------|--------------|
| HDL-c (mmol/L)         | 1.00     | 1.00         | 0.75         | 1.14         |
| LDL-c (mmol/L)         | 4.40     | 3.70         | 3.97         | 4.23         |
| LDL-c month 1 (mmol/L) | 3.06     | 3.08         | 2.85         | 4.00         |
| LDL-c month 2 (mmol/L) | 2.86     | 2.88         | 2.65         | 3.81         |
| LDL-c month 3 (mmol/L) | 2.46     | 2.48         | 2.25         | 3.61         |
| SGOT month 2 (U/L)     | 30.00    | 18.00        | 39.00        | 129.00       |
| SGAT month 2 (U/L)     | 27.00    | 15.00        | 34.00        | 88.00        |
| Muscle pain            | No       | No           | No           | No           |
| Digestive disorder     | No       | No           | No           | No           |
| LDLR gene variant      | Yes      | Yes          | Yes          | Yes          |
| Variant                | c.664T>C | c.1060+10G>C | c.1060+10G>C | c.1060+10G>C |

**Table S2. Summary of the gene variants found in this study.**

| Gene        | Variant location | Nucleotide substitution | Amino acid alterations | Types of Variant | Database ID | dbSNP ID    | Clinical classification | In silico pathogenic analysis |                      |                           | Number of index case | Number of relative |
|-------------|------------------|-------------------------|------------------------|------------------|-------------|-------------|-------------------------|-------------------------------|----------------------|---------------------------|----------------------|--------------------|
|             |                  |                         |                        |                  |             |             |                         | Polyphen-2 HumVar             | Polyphen-2 HumDiv    | Mutation Taster           |                      |                    |
| <i>LDLR</i> | Exon 4           | c.664T>C                | p.Cys222Arg            | Missense         | LDLR_000707 | rs577934998 | Likely pathogenic       | Probably damaging, 1          | Probably damaging, 1 | Disease causing (prob: 1) | 1                    | 38                 |
| <i>LDLR</i> | Intron 7         | c.1060+10G>C            |                        | Splice site      | LDLR_000478 | rs12710260  | Benign                  | -                             | -                    | -                         | 3                    | 57                 |

**Table S3. Baseline characteristics of patients with *LDLR* gene variant.**

| Pedigree | Age | Gender | BMI  | History of MI | Hypertension | Diabetes | Increased total cholesterol | Increased triglyceride | Decrease HDL-c | Increased LDL-c | Dyslipidemia | <i>LDLR</i> Variant |
|----------|-----|--------|------|---------------|--------------|----------|-----------------------------|------------------------|----------------|-----------------|--------------|---------------------|
| 1        | 72  | female | 24.7 | Yes           | Yes          | Yes      | Yes                         | Yes                    | No             | Yes             | Yes          | c.664T>C            |
| 1        | 45  | male   | 23.1 | Yes           | Yes          | No       | Yes                         | No                     | No             | Yes             | Yes          | c.664T>C            |
| 1        | 15  | female | 18.9 | No            | No           | No       | No                          | No                     | No             | Yes             | Yes          | c.664T>C            |
| 1        | 44  | male   | 24.9 | No            | No           | No       | Yes                         | No                     | No             | Yes             | Yes          | c.664T>C            |
| 1        | 18  | male   | 23.7 | No            | No           | No       | No                          | No                     | No             | No              | No           | c.664T>C            |
| 1        | 67  | female | 21.4 | No            | No           | No       | Yes                         | Yes                    | Yes            | Yes             | Yes          | c.664T>C            |
| 1        | 35  | female | 20.8 | No            | No           | No       | Yes                         | Yes                    | No             | Yes             | Yes          | c.664T>C            |
| 1        | 65  | female | 24.3 | Yes           | No           | No       | Yes                         | No                     | No             | Yes             | Yes          | c.664T>C            |
| 1        | 45  | female | 19.0 | No            | No           | No       | Yes                         | No                     | No             | Yes             | Yes          | c.664T>C            |
| 1        | 21  | male   | 24.2 | No            | No           | No       | No                          | No                     | No             | Yes             | Yes          | c.664T>C            |
| 1        | 61  | female | 20.8 | No            | No           | Yes      | Yes                         | Yes                    | No             | Yes             | Yes          | c.664T>C            |
| 1        | 38  | male   | 23.9 | No            | No           | Yes      | Yes                         | Yes                    | Yes            | Yes             | Yes          | c.664T>C            |
| 1        | 7   | male   | 21.0 | No            | No           | No       | No                          | No                     | No             | No              | No           | c.664T>C            |
| 1        | 38  | male   | 24.6 | No            | Yes          | Yes      | Yes                         | Yes                    | No             | Yes             | Yes          | c.664T>C            |
| 1        | 53  | male   | 23.6 | No            | Yes          | Yes      | Yes                         | No                     | No             | Yes             | Yes          | c.664T>C            |
| 1        | 32  | female | 21.1 | No            | No           | No       | Yes                         | No                     | No             | Yes             | Yes          | c.664T>C            |
| 1        | 29  | male   | 23.2 | No            | No           | No       | No                          | No                     | No             | Yes             | Yes          | c.664T>C            |
| 2        | 68  | female | 27.6 | No            | Yes          | No       | No                          | Yes                    | Yes            | No              | Yes          | c.1060+10G>C        |
| 2        | 51  | male   | 24.6 | No            | No           | No       | No                          | Yes                    | No             | Yes             | Yes          | c.1060+10G>C        |
| 2        | 32  | male   | 24.3 | No            | No           | No       | No                          | No                     | No             | Yes             | Yes          | c.1060+10G>C        |
| 2        | 48  | female | 25.3 | No            | No           | No       | Yes                         | No                     | No             | Yes             | Yes          | c.1060+10G>C        |
| 2        | 15  | female | 21.9 | No            | No           | No       | No                          | No                     | No             | No              | No           | c.1060+10G>C        |
| 2        | 44  | male   | 24.9 | No            | No           | No       | No                          | No                     | No             | No              | No           | c.1060+10G>C        |
| 2        | 12  | male   | 21.4 | No            | No           | No       | No                          | No                     | No             | No              | No           | c.1060+10G>C        |
| 2        | 10  | male   | 17.9 | No            | No           | No       | No                          | No                     | No             | No              | No           | c.1060+10G>C        |
| 2        | 40  | female | 22.1 | No            | No           | No       | No                          | No                     | No             | Yes             | Yes          | c.1060+10G>C        |
| 2        | 12  | male   | 19.4 | No            | No           | No       | No                          | Yes                    | No             | No              | Yes          | c.1060+10G>C        |

|   |    |        |      |     |     |    |     |     |     |     |     |              |
|---|----|--------|------|-----|-----|----|-----|-----|-----|-----|-----|--------------|
| 2 | 63 | male   | 22.9 | Yes | No  | No | No  | Yes | Yes | Yes | Yes | c.1060+10G>C |
| 2 | 12 | female | 19.1 | No  | No  | No | No  | Yes | Yes | No  | Yes | c.1060+10G>C |
| 2 | 55 | female | 24.0 | Yes | No  | No | Yes | Yes | No  | Yes | Yes | c.1060+10G>C |
| 2 | 36 | female | 25.0 | No  | No  | No | No  | Yes | Yes | Yes | Yes | c.1060+10G>C |
| 3 | 57 | female | 24.7 | Yes | Yes | No | Yes | Yes | Yes | Yes | Yes | c.1060+10G>C |
| 3 | 40 | male   | 23.7 | No  | No  | No | Yes | Yes | No  | Yes | Yes | c.1060+10G>C |
| 3 | 17 | male   | 22.5 | No  | No  | No | No  | Yes | No  | No  | Yes | c.1060+10G>C |
| 3 | 12 | male   | 20.8 | No  | No  | No | No  | No  | No  | No  | No  | c.1060+10G>C |
| 3 | 36 | female | 20.8 | No  | No  | No | No  | Yes | No  | No  | Yes | c.1060+10G>C |
| 3 | 10 | male   | 20.2 | No  | No  | No | No  | Yes | No  | No  | Yes | c.1060+10G>C |
| 3 | 8  | male   | 18.4 | No  | No  | No | No  | No  | No  | No  | No  | c.1060+10G>C |
| 3 | 34 | male   | 25.2 | No  | No  | No | No  | No  | No  | No  | No  | c.1060+10G>C |
| 3 | 8  | female | 18.6 | No  | No  | No | No  | No  | No  | No  | No  | c.1060+10G>C |
| 3 | 31 | male   | 23.9 | No  | No  | No | No  | No  | No  | Yes | Yes | c.1060+10G>C |
| 4 | 72 | male   | 23.8 | No  | No  | No | No  | Yes | No  | Yes | Yes | c.1060+10G>C |
| 4 | 49 | male   | 23.5 | No  | No  | No | Yes | Yes | Yes | Yes | Yes | c.1060+10G>C |
| 4 | 22 | female | 21.8 | No  | No  | No | No  | No  | No  | Yes | Yes | c.1060+10G>C |
| 4 | 16 | male   | 22.1 | No  | No  | No | No  | No  | No  | No  | No  | c.1060+10G>C |
| 4 | 47 | male   | 25.8 | Yes | No  | No | Yes | Yes | No  | Yes | Yes | c.1060+10G>C |
| 4 | 12 | female | 19.3 | No  | No  | No | No  | Yes | Yes | No  | Yes | c.1060+10G>C |
| 4 | 45 | female | 21.2 | No  | No  | No | Yes | Yes | No  | Yes | Yes | c.1060+10G>C |
| 4 | 10 | male   | 18.1 | No  | No  | No | No  | No  | No  | No  | No  | c.1060+10G>C |

**Table S4. Characteristics of the patients included in the lipid-lowering cohort.**

|                                     | <b>Total group (n=47)</b> | <b>Variant-positive (n=30)</b> | <b>Variant-negative (n=17)</b> |
|-------------------------------------|---------------------------|--------------------------------|--------------------------------|
| Age (Median IQR) (years)            | 44 (37, 53)               | 45 (34, 56)                    | 43 (39, 52)                    |
| Male (Yes) (n)                      | 24                        | 15 (50%)                       | 9 (53%)                        |
| Pedigree (n)                        |                           |                                |                                |
| 1                                   | 24                        | 15 (50%)                       | 9 (53%)                        |
| 2                                   | 11                        | 7 (23%)                        | 4 (24%)                        |
| 3                                   | 6                         | 3 (10%)                        | 3 (18%)                        |
| 4                                   | 6                         | 5 (17%)                        | 1 (6%)                         |
| Smoking (yes) (n)                   | 8                         | 5 (17%)                        | 3 (18%)                        |
| Hypertension (yes) (n)              | 6                         | 5 (17%)                        | 1 (6%)                         |
| Diabetes (yes) (n)                  | 7                         | 5 (17%)                        | 2 (12%)                        |
| History of MI (yes) (n)             | 8                         | 7 (27%)                        | 1 (6%)                         |
| BMI ( Mean±SD) (kg/m <sup>2</sup> ) | 22.9±1.84                 | 23.2±1.81                      | 22.5±1.86                      |

**Table S5. Primer sequences for PCR amplification.**

| Primer name | Primer sequence (5' – 3') | Length (bp) | Region      |
|-------------|---------------------------|-------------|-------------|
| LDLR-c1F    | TCCCCCTGCTAGAAACCTCA      | 313         | Exon 1      |
| LDLR-g1R    | ACAAGTCTCCCAGGGATGGA      |             |             |
| LDLR-g2F    | TGGGTTCCCTTCTTTGTGTCC     | 606         | Exon 2      |
| LDLR-g2R    | TGGCTTTAAGGAAAGCTCCA      |             |             |
| LDLR-g3F    | TATTGGCCAGGCTGGTCTTG      | 418         | Exon 3      |
| LDLR-g3R    | GCGGAAGAGGCTTGGTATGA      |             |             |
| LDLR-g4F    | GGCTATAGAATGGGCTGGTG      | 539         | Exon 4      |
| LDLR-g4R    | GGCACCTAAATCACTGCATG      |             |             |
| LDLR-g5F    | GGGCTCAAGCAATCCTCCTG      | 332         | Exon 5      |
| LDLR-g5R    | CACAAATCATTTGCAAGCAG      |             |             |
| LDLR-g6F    | CTGAGGCTCAGACACACCTG      | 293         | Exon 6      |
| LDLR-g6R    | AAAGGAGCCCCTTTGCACAGG     |             |             |
| LDLR-g7F    | GAGGTGGAGGTTGTAATGAG      | 287         | Exon 7      |
| LDLR-g7R    | ACTGAGGCATGAGGGGTTTG      |             |             |
| LDLR-g8F    | CGCTCCGTCTCTAGCCATTG      | 288         | Exon 8      |
| LDLR-g8R    | AGGGGATATGAGTCTGTGCA      |             |             |
| LDLR-g9F    | ACCCTGCAGGATGACACAAG      | 655         | Exons 9-10  |
| LDLR-g10R2  | AGCCCACTAACCAGTTCCTG      |             |             |
| LDLR-g11F   | GACTATTTCCCAAGCCTGAG      | 1140        | Exons 11-12 |
| LDLR-g12R   | AGGTCTAAGACCTCCTCCTA      |             |             |
| LDLR-g13F   | CTCATCCCAGTGTTTAACGG      | 599         | Exons 13-14 |

|           |                      |     |         |
|-----------|----------------------|-----|---------|
| LDLR-g14R | TCCCGACTCATGAGTCCTTA |     |         |
| LDLR-g15F | TCCTGGACTCACTCAAGAGA | 429 | Exon 15 |
| LDLR-g15R | AGTGAGAGAAGGTCAGCAAG |     |         |
| LDLR-g16F | CAAGTGTCCAGGGAGATGTG | 263 | Exon 16 |
| LDLR-g16R | GCCAGGCACGAGGTCACATA |     |         |
| LDLR-g17F | TTTTCACTCCAGCCACGGAG | 348 | Exon 17 |
| LDLR-g17R | ATGCTGTCCTCGATCTGGAG |     |         |
| LDLR-g18F | GCCCAGGAGGTGAGAAGTAG | 184 | Exon 18 |
| LDLR-18R  | AAAACAAGGCCGGCGAGGTC |     |         |
